# Supplementary material for: Monocytes differentiated into macrophages and dendritic cells in the presence of human IFN-λ3 or IFN-λ4 show distinct phenotypes
Source: PubMed Central journal article supplement (PMC7611425; doi:10.1002/jlb.3a0120-001rrr), 2020-11-17
Supplement: EMS104721-supplement-Supporting_Information_fig_5.pdf [file EMS104721-supplement-Supporting_Information_fig_5.pdf]

## Suppl. Fig. 5

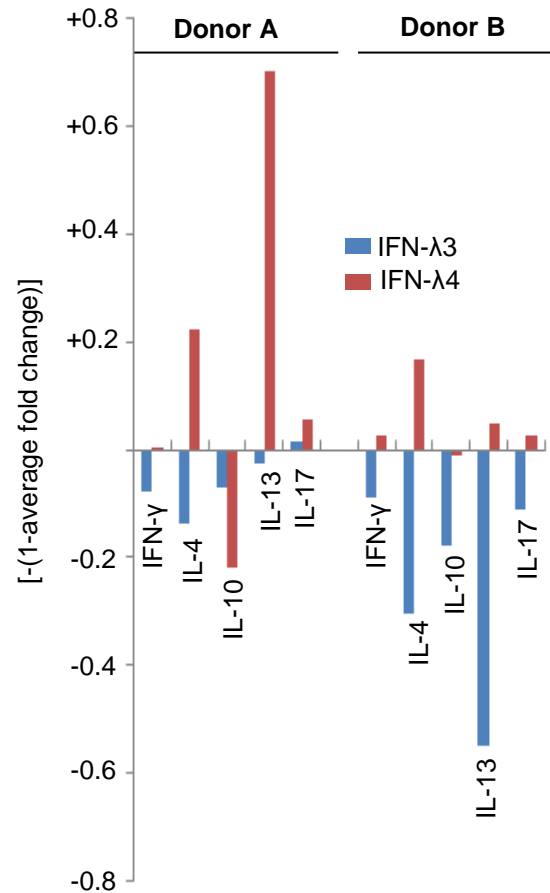

**Suppl. Fig. 5:** Monocyte-derived dendritic cells (MoDCs) differentiated in co-cultures in the presence of IFN-λ3 show an overall downregulation of cytokines, whereas those differentiated in presence of IFN-λ4 showed upregulated IL-4 and IL-13. The average fold changes for the respective cytokines from co-cultures involving MoDCs derived from CD14<sup>+</sup> donor A or B were subtracted from (+1) and multiplied by (-1) to obtain the values plotted on the Y-axis.
